# Supplementary material for: Novel preparation of metal-free carbon xerogels under acidic conditions and their performance as high-energy density supercapacitor electrodes
Source: Royal Society of Chemistry journal article supplement (doi:10.1039/d3na00517h), 2023-01-01
Supplement: d3na00517h1.pdf [file d3na00517h1.pdf]

### Supplementary information

---

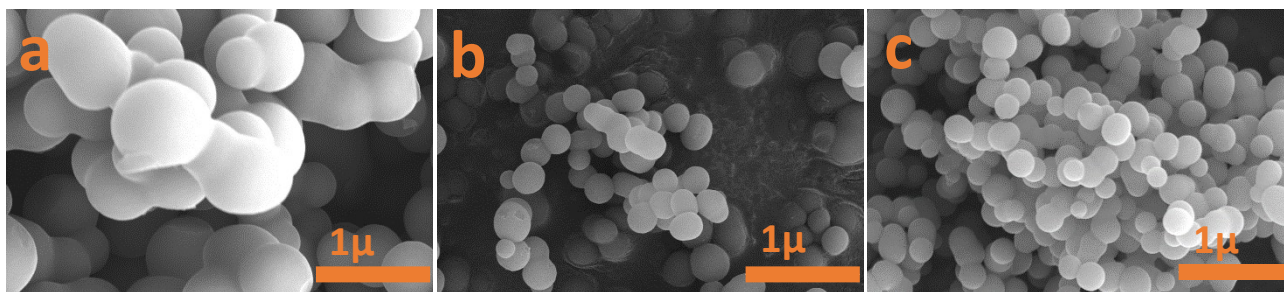

**Figure S1:** The FESEM images of (a) CX0.01, (b) CX0.05 and (c) CX0.1 at a scale of 1 μm, after the stability test.
